# Supplementary material for: Suppressor mutations identify amino acids in PAA-1/PR65 that facilitate regulatory RSA-1/B″ subunit targeting of PP2A to centrosomes in C. elegans
Source: PubMed Central journal article supplement — Biol Open. 2012 Nov 13;2(1):88–94. doi: 10.1242/bio.20122956 (PMC3545272; doi:10.1242/bio.20122956), 2012-11-13
Supplement: supp_bio.20122956_bio.20122956-s1.pdf [file supp_bio.20122956_bio.20122956-s1.pdf]

Supplementary Material

Karen I. Lange et al. doi: 10.1242/bio.20122956

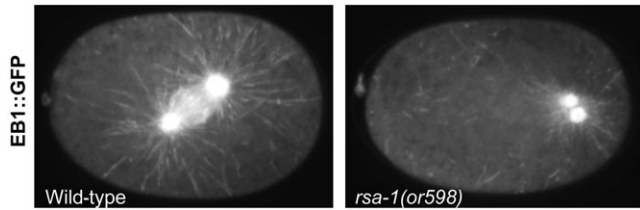

**Fig. S1. *rsa-1(or598ts)* has fewer microtubules emanating from the centrosomes.** EB1::GFP decorates the growing ends of microtubules. Panels shown are a maximum projection of 25 images acquired as a GFP live stream (300 ms frame rate over 7.5 seconds) of a wild-type and *rsa-1(or598)* embryo expressing EB1::GFP. In wild-type embryos there are more EB1 tracks than in *rsa-1(or598ts)* embryos.

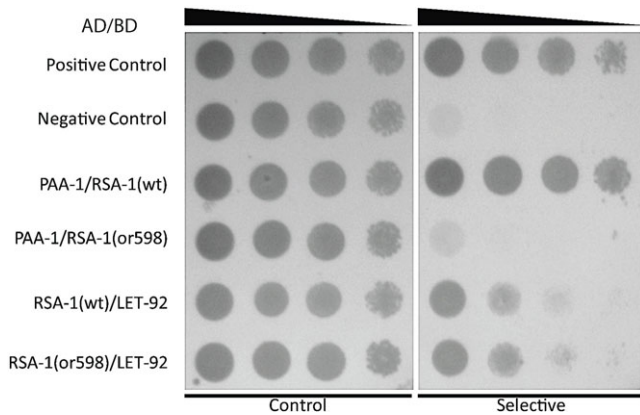

**Fig. S2. Yeast-two-hybrid analysis.** Control medium is SC-trp-leu to select for the transformed plasmids. Selective medium is SC-trp-leu-his and requires interaction between the activation domain (AD) fusion protein and the binding domain (BD) fusion protein to facilitate growth. The positive control is AD::RAF/BD::RAS and the negative control is AD::Empty/BD::RAS, provided by Addgene. Yeast were plated in a dilution series of 1, 1/10, 1/100, and 1/1000.

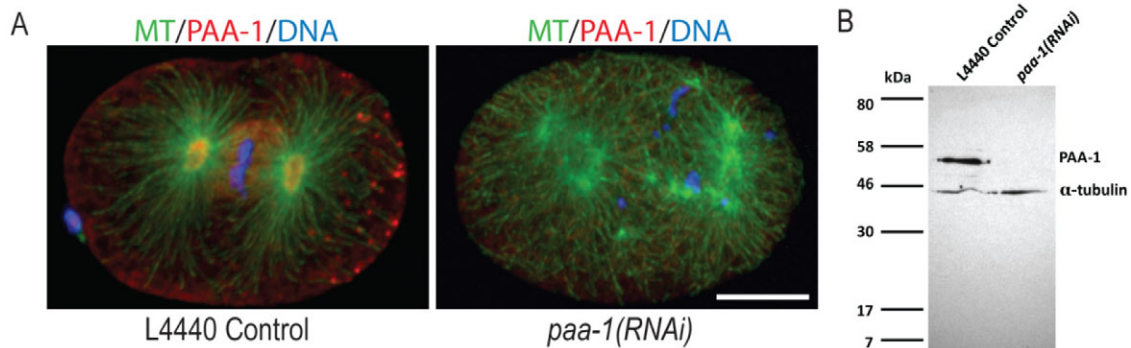

**Fig. S3. Confirmation of the specificity of the rabbit-anti-PAA-1 antibody.** (A) Immunofluorescence staining of *paa-1(RNAi)* embryos after 28 hours of RNAi feeding. Scale bar represents 10  $\mu$ m. (B) Western blot of embryo preparations, from Fig. 1, but with extended field to indicate antibody specificity. PAA-1 migration is consistent with a size of ~55 kDa.

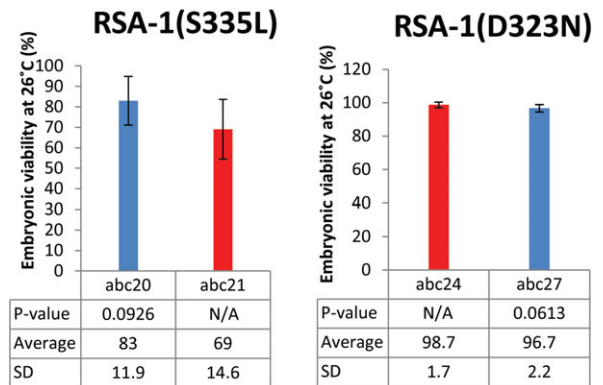

**Fig. S4. Homozygous embryonic viability at 26°C of intragenic suppressors with multiple alleles.** Red bar indicates reference allele for each amino acid substitution. No statistical difference was observed between the alleles of each suppressor, so only one reference allele was used for subsequent analysis. Error bars represent standard deviation. Embryonic viabilities between alleles were considered to be significantly different if the P-value was less than 0.0500 in an unpaired, two-tailed *t*-test.

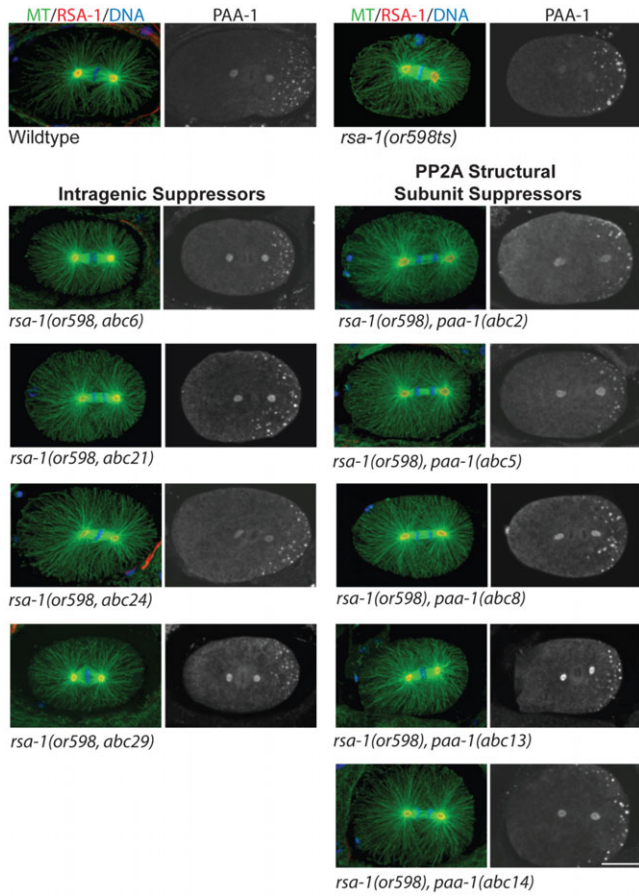

**Fig. S5. Interaction suppressors in PP2A/RSA-1 complex restore recruitment of PAA-1 protein to centrosomes.** Representative fixed embryos for *rsa-1* and *paa-1* suppressors stained with anti-PAA-1 and anti-RSA-1. Scale bar represents 10  $\mu$ m.

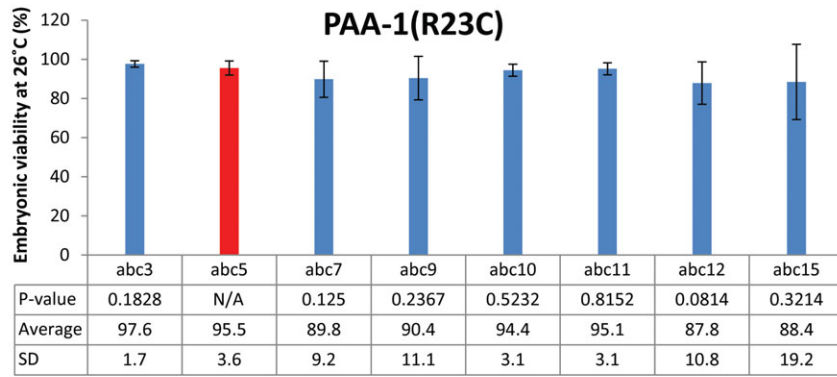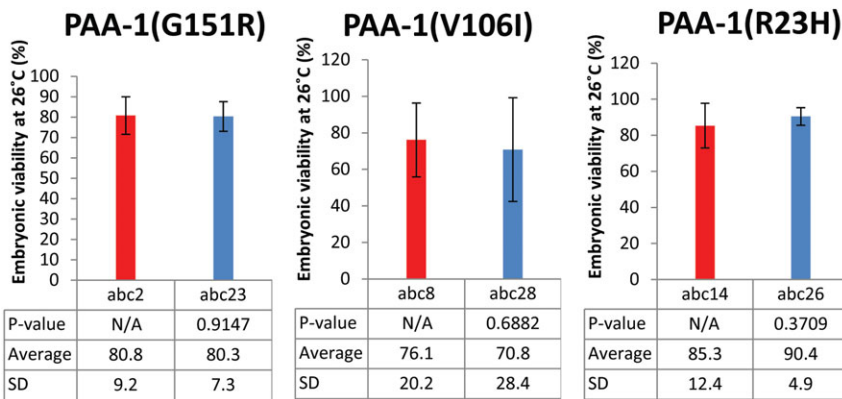

**Fig. S6. Homozygous embryonic viability at 26°C of suppressors with multiple alleles in *paa-1*.** Red bar indicates reference allele for each amino acid substitution. No statistical difference between multiple alleles of each suppressor so only one reference allele was used for subsequent analysis. Error bars represent standard deviation. Embryonic viabilities between alleles were considered to be significantly different if the P-value was less than 0.0500 in unpaired, two-tailed *t*-test.

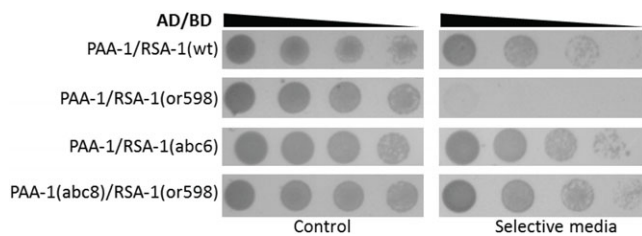

**Fig. S7. Yeast-two-hybrid analysis with representative suppressor mutations.** Control medium is SC-trp-leu to select for the transformed plasmids. Selective medium is SC-trp-leu-his and requires interaction between the activation domain (AD) fusion protein and the binding domain (BD) fusion protein to facilitate growth. Yeast were plated in a dilution series of 1, 1/10,

**Table S1. PCR primers used in this study.** Restriction enzyme sites are in bold. Mutagenic lesions are in red.

| Primers for yeast two hybrid analysis         |                                                                                                                             |
|-----------------------------------------------|-----------------------------------------------------------------------------------------------------------------------------|
| <i>paa-1</i> into pAct2.2                     | 5'TTTCCCGGGCTTGTTCGGTTGTCTGAAGAAGCC<br>5'TTTCCCGGGAGGTACAAGCCGAGTGAGTTCTTGG                                                 |
| <i>let-92</i> into pLexA                      | 5'TTTCCCGGGCGCAGGCTTGGCTGCTGCC<br>5'TTTCTGCAGGGTACAGGAAGTAGTCAGGC                                                           |
| <i>rsa-1</i> into pLexA/pACT2.2               | 5'TTTGGATCCGCTTGCCAACCGACGAACCTTC<br>5'TTTCTGCAGGGTATTGCTCGCGTCGTTCG                                                        |
| <i>rsa-1</i> ( <i>or598</i> ) PCR mutagenesis | 5'/Phos/TACCATTCGAAATTCTGG <b>G</b> TCTAAAGGATGATGGACTGTTG<br>5'/Phos/CAACAGTCCATCATCCTTTAGAC <b>CC</b> CAGAATTCGAAATGGTA   |
| <i>rsa-1</i> ( <i>abc6</i> ) PCR mutagenesis  | 5'/Phos/CAAATACCATTCGAAATTCTG <b>A</b> GTCTAAAGGATGATGGACTG<br>5'/Phos/CAGTCCATCATCCTTTAGACT <b>C</b> AGAATTCGAAATGGTATTTG  |
| <i>paa-1</i> ( <i>abc8</i> ) PCR mutagenesis  | 5'/Phos/GCCACAGTCGAGGAGACCGTGA <b>A</b> TCCGTGACAAAGCCGTTGAG<br>5'/Phos/CTCAACGGCTTTGTACGGAT <b>T</b> CACGGTCTCCTCGACTGTGGC |
| Primers for PAA-1 antibody production         |                                                                                                                             |
| <i>paa-1</i> C-terminus into pGEX-6P-1        | 5'CCCGGGGTACACGAACCTTCTCAAGG<br>5'GCGGCCGCTTAATGCTTTCTTATAATGCC                                                             |
| <i>paa-1</i> C-terminus into pMALc5x          | 5'GGGGCATATGTACACGAACCTTCTCAAG<br>5'GCGGCCGCTTAATGCTTTCTTATAATGCC                                                           |
